# Supplementary material for: Transcriptomic resources for Bagrada hilaris (Burmeister), a widespread invasive pest of Brassicales
Source: PubMed Central journal article supplement (PMC11676520; doi:10.1371/journal.pone.0310186), 2024-12-27

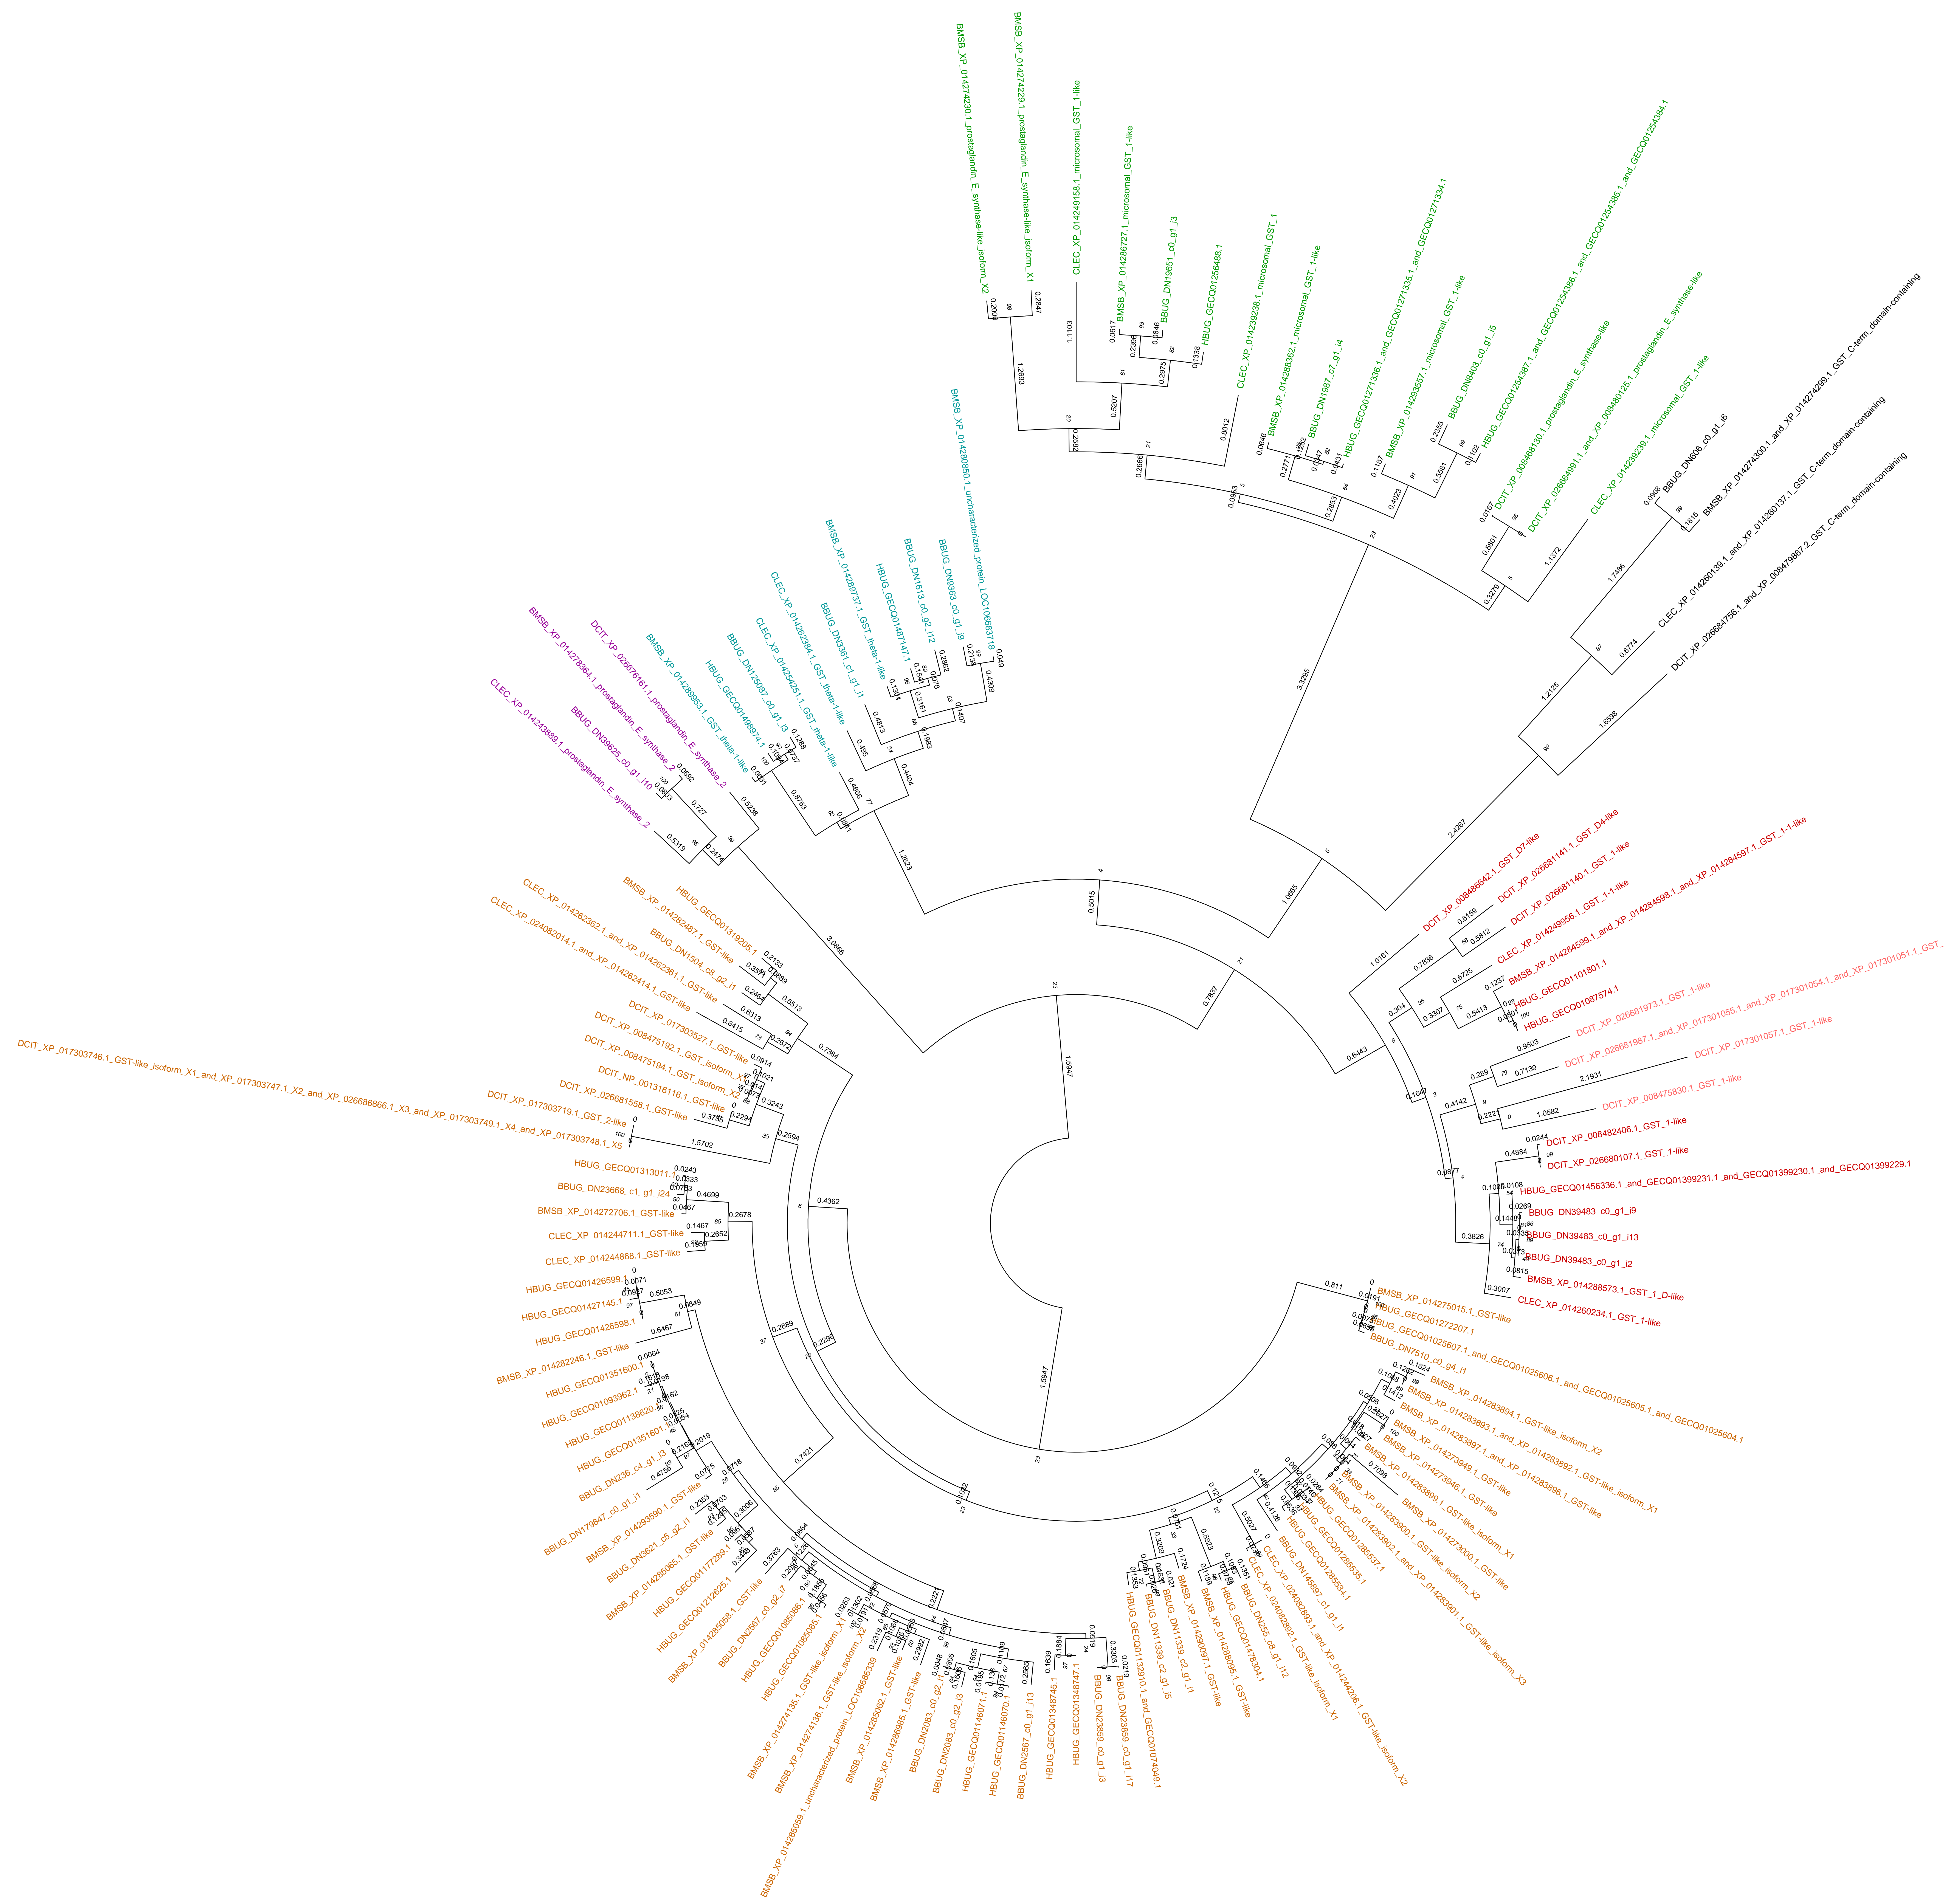

Supplement: pone.0310186.s004.pdf [file pone.0310186.s004.pdf]
